# Supplementary material for: E-Cigarette Retailers’ Use of Instagram in New Zealand: A Content Analysis
Source: Int J Environ Res Public Health. 2023 Jan 19;20(3):1897. doi: 10.3390/ijerph20031897 (PMC9914635; doi:10.3390/ijerph20031897)
Supplement: Supplementary file 1 [file ijerph-20-01897-s001.zip › ijerph-2095354-supplementary.pdf]

**Table S1.** Instagram Post and Story Characteristics: Definitions and Examples.

| Details                          | Instagram Post and Story Characteristics: Definitions and Examples                                                                                                                                                 | Total<br><i>n</i> = 513 | %     |
|----------------------------------|--------------------------------------------------------------------------------------------------------------------------------------------------------------------------------------------------------------------|-------------------------|-------|
| <b>Health Risks and Benefits</b> |                                                                                                                                                                                                                    |                         |       |
| <b>Smoking cessation</b>         | <p>Post contains references to smoking, quitting, switching from combustible cigarettes and/or “make the switch” or similar.</p> 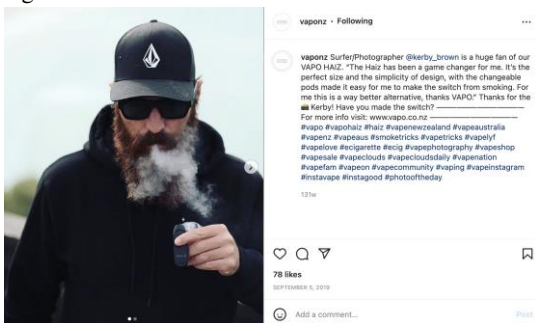 | 50                      | 9.7%  |
| <b>Contains Nicotine</b>         | <p>Post contains statements that product contains nicotine.</p> 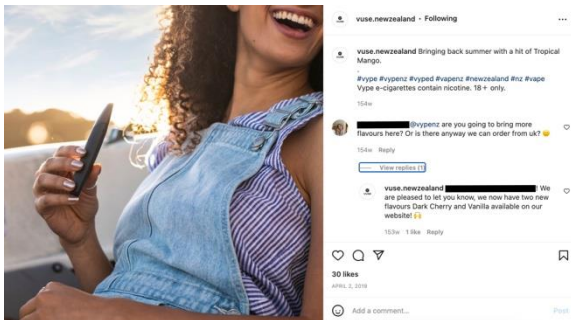                                                                | 144                     | 28.1% |
| <b>Addiction warnings</b>        | <p>Post contains warnings about nicotine addiction and/or "Nicotine is an addictive substance" or similar.</p> 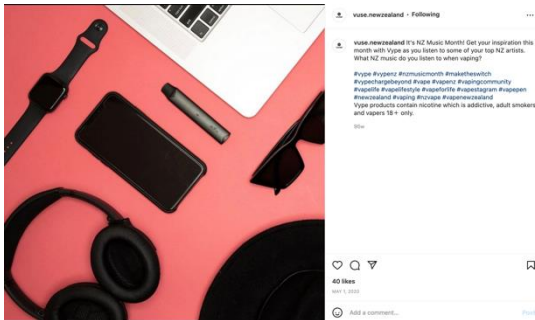                 | 39                      | 7.6%  |
| <b>Featured Events</b>           |                                                                                                                                                                                                                    |                         |       |
| <b>Music festivals/gigs</b>      | <p>Post contains references to organised music concerts or series of concerts (festival).</p>                                                                                                                      | 98                      | 19.1% |

|                                   |                                                                                                                                                                         |          |
|-----------------------------------|-------------------------------------------------------------------------------------------------------------------------------------------------------------------------|----------|
|                                   | 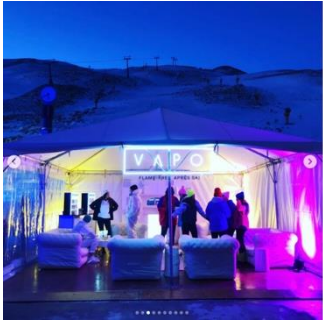 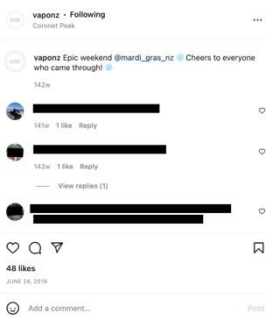    |          |
| <b>Motorsport</b>                 | Post contains references to a sports event involving racing cars or other motor vehicle events.                                                                         | 6 1.2%   |
|                                   | 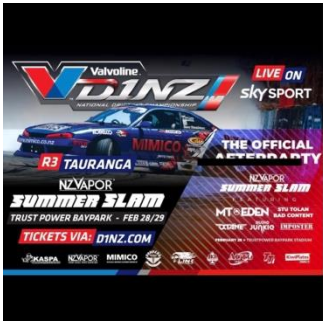 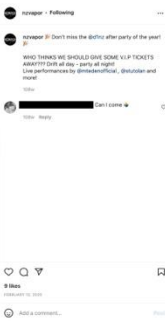     |          |
| <b>Expos</b>                      | Post contains references to an exhibition event tradeshow.                                                                                                              | 9 1.8%   |
|                                   | 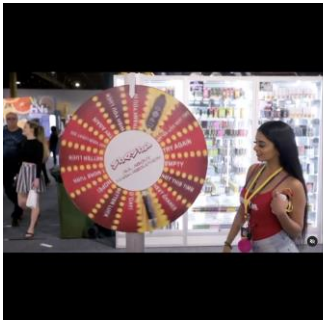 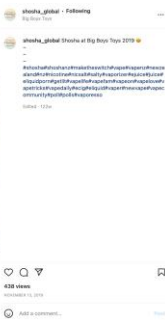 |          |
| <b>Other</b>                      | Post contains references to other events including sporting events e.g., boxing matches, awards ceremonies or other.                                                    | 4 0.8%   |
|                                   | 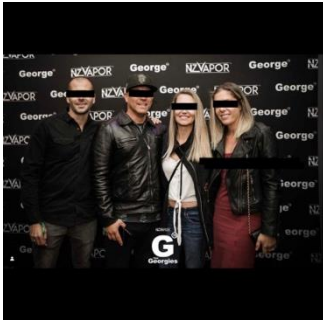 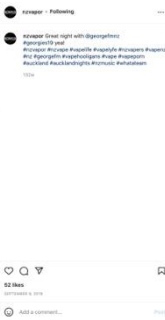 |          |
| <b>Giveaways and competitions</b> |                                                                                                                                                                         |          |
| <b>Events</b>                     | Post contains a competition or giveaway where the prize is event entry.                                                                                                 | 54 10.5% |

|                             |                                                                                                                                                                          |     |       |
|-----------------------------|--------------------------------------------------------------------------------------------------------------------------------------------------------------------------|-----|-------|
|                             | 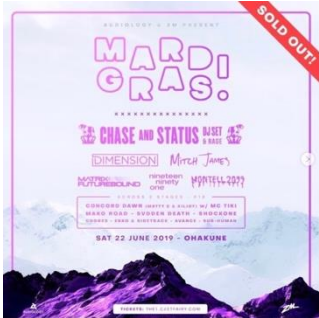 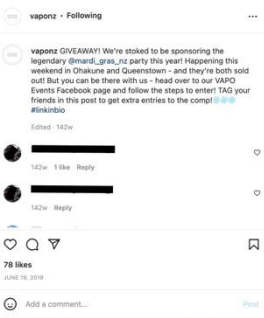     |     |       |
| <b>Products</b>             | Post contains a competition or giveaway where prizes are products including e-cigarette devices, e-liquid refills, food vouchers, vouchers and/or other products.        | 46  | 9.0%  |
|                             | 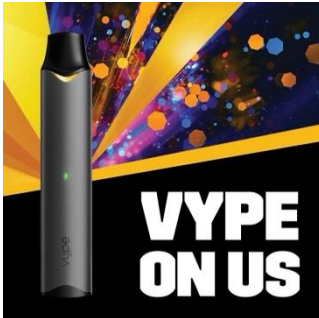 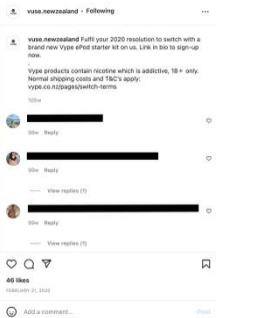     |     |       |
| <b>Lifestyle marketing</b>  |                                                                                                                                                                          |     |       |
| <b>Influencers (tagged)</b> | Post contains individuals with more than 500 followers AND are tagged in the post using their Instagram handle e.g., "@XXXX"                                             | 47  | 9.2%  |
|                             | 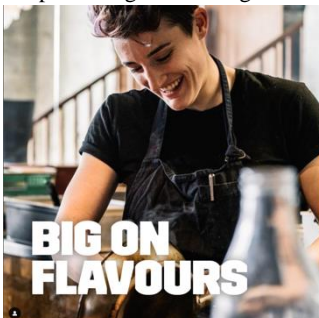 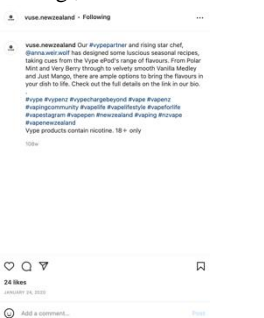 |     |       |
| <b>Models/People</b>        | Post contains individuals who are paid models, or members of the public who feature in posts AND are not tagged using their Instagram handle                             | 188 | 36.6% |
|                             | 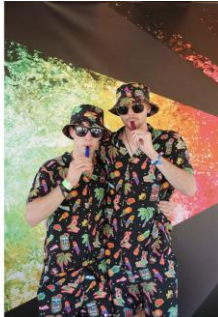 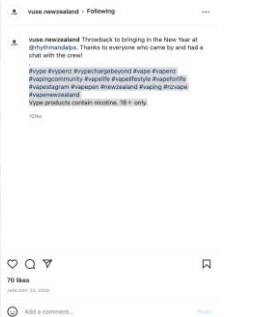  |     |       |
| <b>Everyday items</b>       | Post contains personal and everyday items including laptops, headphones, smartphones and/or cameras.                                                                     | 25  | 4.9%  |

|                  | 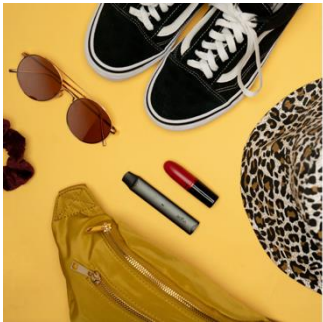                                                                                                                      |           |
|------------------|--------------------------------------------------------------------------------------------------------------------------------------------------------------------------------------------------------|-----------|
| Devices          |                                                                                                                                                                                                        |           |
| Pod              | <p>Post contains a compact e-cigarette device that uses a pod chamber to hold e-liquid.</p> 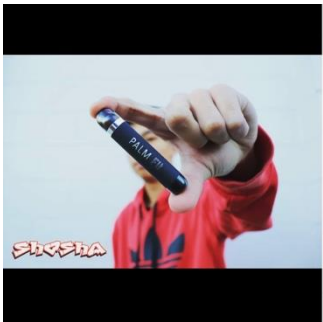                          | 157 30.6% |
| Modifiable       | <p>Post contains a modifiable “mod” device with refillable chambers to hold e-liquid.</p> 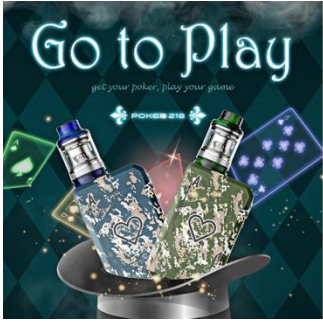                          | 54 10.5%  |
| Disposable       | <p>Post contains a disposable single use device</p> <p>-</p>                                                                                                                                           | 0 0.0%    |
| Product Features |                                                                                                                                                                                                        |           |
| Style            | <p>Post contains statements that refer to aspects of style such as colour, individuality and/or discrete size.</p> 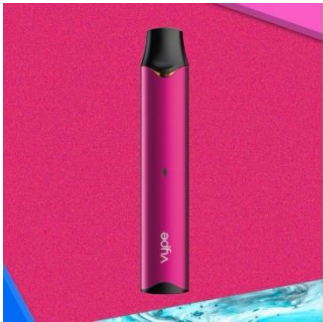 | 65 12.7%  |
| Ease of use      | <p>Post contains statements that refer to design features that make the product</p>                                                                                                                    | 58 11.3%  |

|                                 | simple to use including referencing to being easy to use and/or for beginners                                                                                            |         |
|---------------------------------|--------------------------------------------------------------------------------------------------------------------------------------------------------------------------|---------|
|                                 | 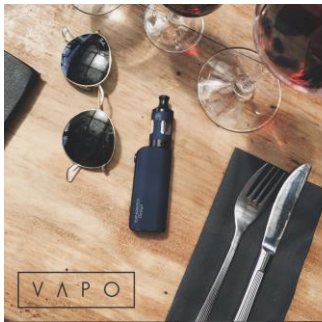 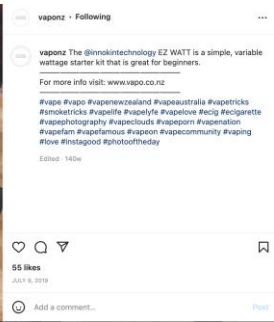     |         |
| <b>Quality</b>                  | Post contains aspects of quality such as scientific standards.                                                                                                           | 23 4.5% |
|                                 | 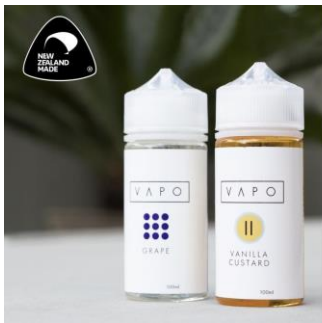 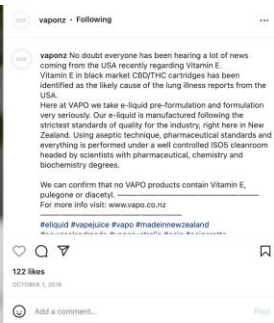     |         |
| <b>Environmentally friendly</b> | Post contains aspects of positive environmental impacts including recycling, biodegradable materials, sustainability and/or palm oil free.                               | 5 1.0%  |
|                                 | 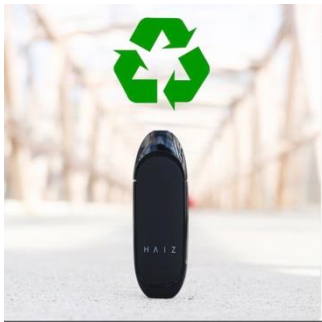 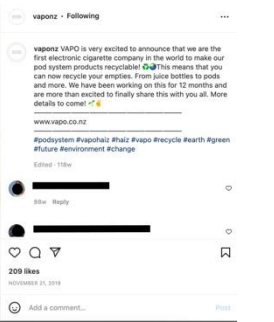 |         |
| Price Promotions                |                                                                                                                                                                          |         |
| <b>Discounts</b>                | Post contains references to price discounts.                                                                                                                             | 26 5.1% |
|                                 | 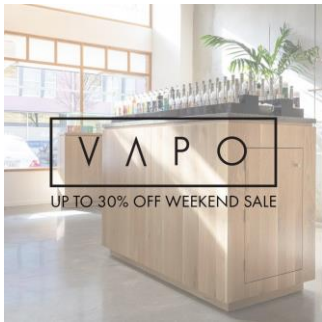 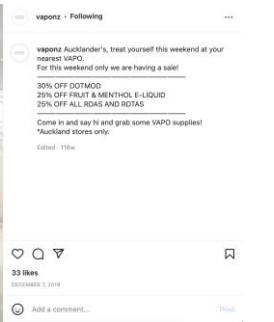 |         |
| <b>Deals</b>                    | Post contains references to pricing deals including bundles, gifts with purchase.                                                                                        | 6 1.2%  |

6
